# Supplementary material for: Flexible and monolithic zinc oxide bionanocomposite foams by a bacterial cellulose mediated approach for antibacterial applications
Source: Royal Society of Chemistry journal article supplement (doi:10.1039/c3dt52858h), 2014-01-01
Supplement: c3dt52858h1.pdf [file c3dt52858h1.pdf]

## Electronic Supplementary Information (ESI):

### **Flexible and monolithic zinc oxide bionanocomposite foams by a bacterial cellulose mediated approach for antibacterial applications**

Pei-Pei Wang<sup>a</sup>, Jun Zhao<sup>a</sup>, Rui-Fei Xuan<sup>ab</sup>, Yun Wang<sup>a</sup>, Chen Zou<sup>a</sup>, Zhiquan Zhang<sup>c</sup>,  
Yizao Wan<sup>d</sup> and Yan Xu<sup>\*a</sup>

<sup>a</sup>State Key Laboratory of Inorganic Synthesis and Preparative Chemistry, Jilin University,  
Changchun 130012, China;

<sup>b</sup>College of Materials Science and Engineering, China University of Mining and Technology,  
Xuzhou 221116, China;

<sup>c</sup>College of Chemistry, Jilin University, Changchun 130012, China;

<sup>d</sup>School of Materials Science and Engineering, Tianjin University, Tianjin 300072, China.

To whom the correspondence should be addressed:

Prof. Dr. Yan Xu  
State Key Lab of Inorganic Synthesis and Preparative Chemistry  
Jilin University  
2699 Qianjin Street  
Changchun 130012  
China  
Email: yanxu@jlu.edu.cn

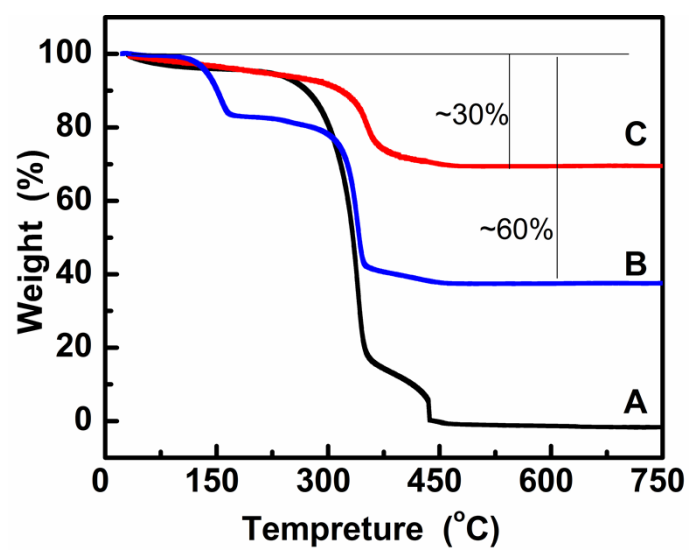

**Figure S1.** Thermal gravimetric analysis: (A) BC aerogel.  
(B) ZnO/BC foam with 40 wt% ZnO obtained after 3 h of autoclaving at 85 °C.  
(C) The ZnO/BC foam with 70 wt% ZnO after 6 h of autoclaving at 85 °C.

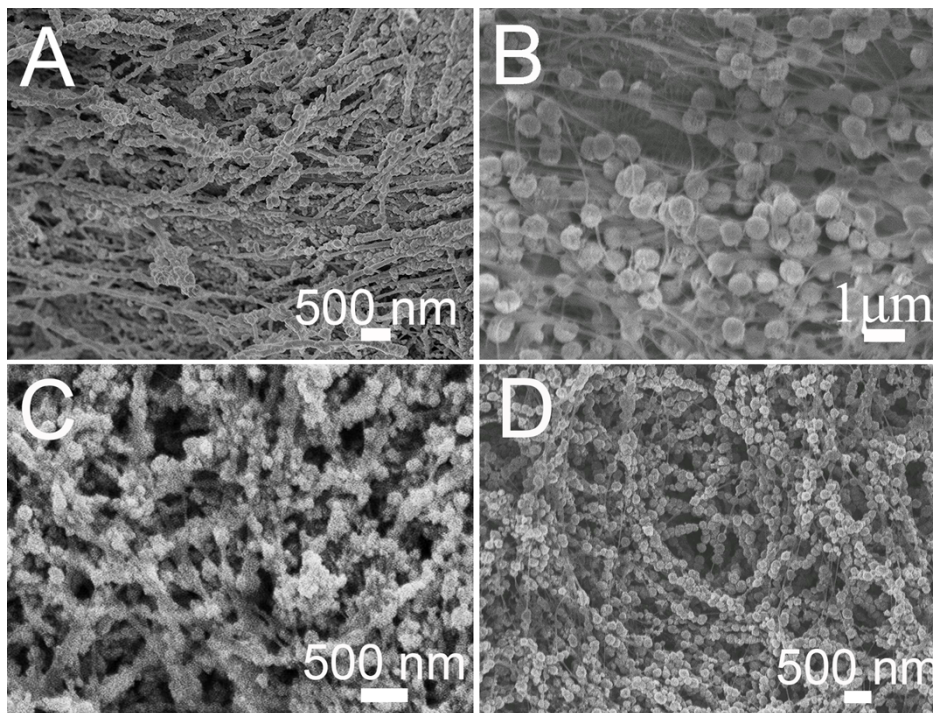

**Figure S2.** (A) A ZnO/BC foam obtained from solvothermal crystallization using the residual ethanol/hexamine of Step 2. (B) A ZnO/BC foam obtained by one-pot solvothermal crystallization according to the specified stoichiometry. (C) A ZnO/BC foam obtained using *iso*-propanol in place of ethanol. (D) A ZnO/BC foam obtained by refluxing in ethanol and crystallization in water/hexamine under autogenous pressure conditions.

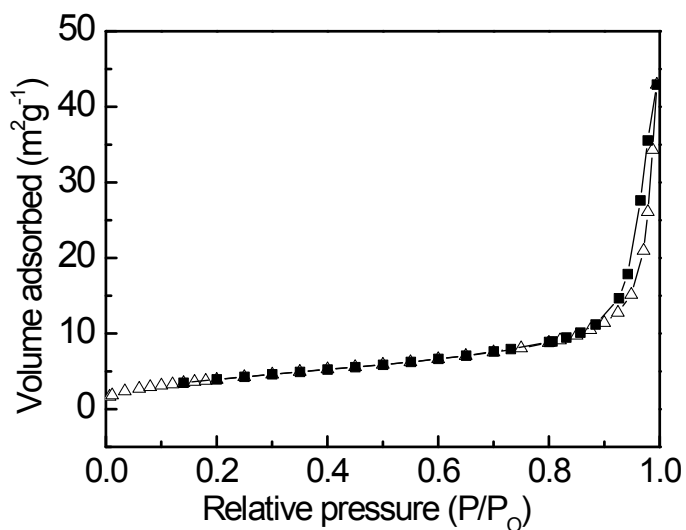

**Figure S3.** Nitrogen adsorption-desorption isotherm of the ZnO powder.

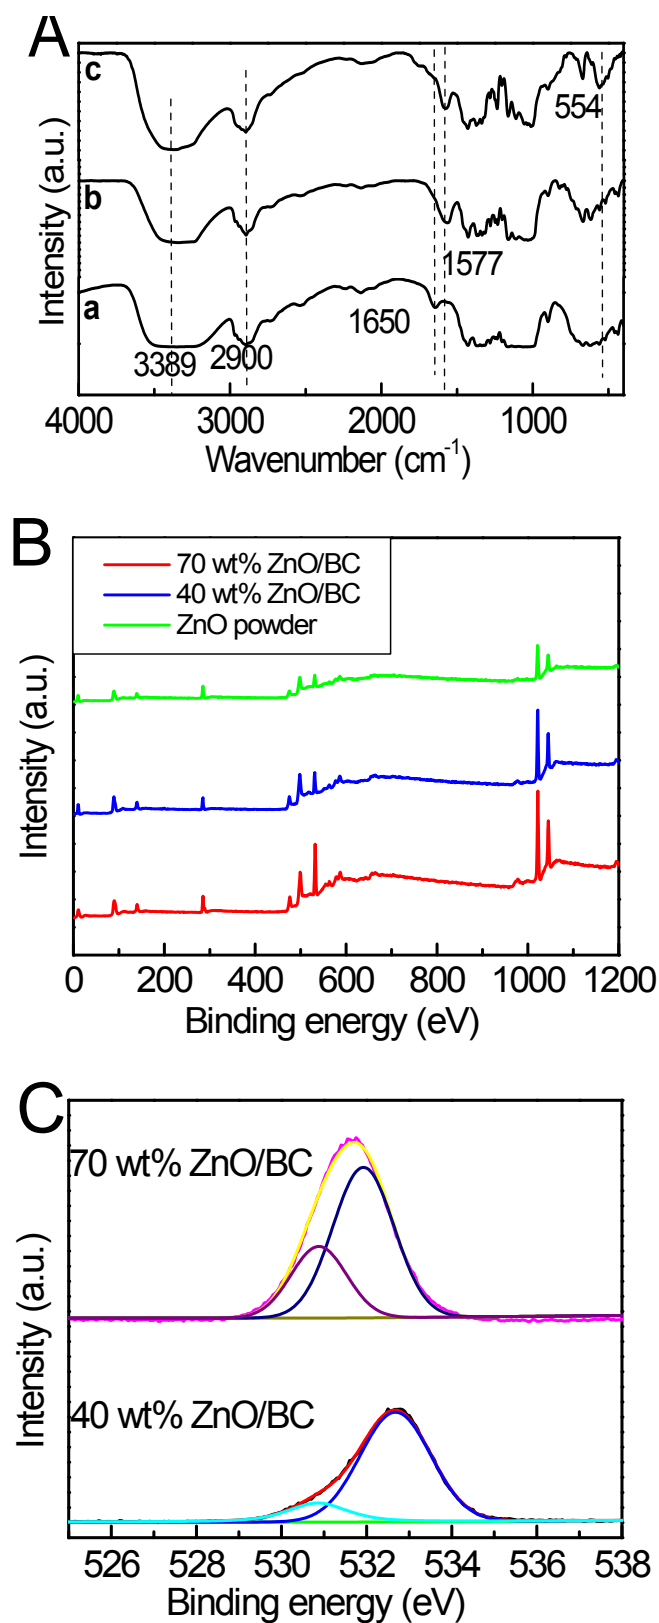

**Figure S4.** (A) FTIR spectra: (a) the BC aerogel; (b) the intermediate product of Step 1; (c) the ZnO/BC foam showing the increasing intensities of the peaks at  $554\text{ cm}^{-1}$  and  $1577\text{ cm}^{-1}$ , and weakening absorption at  $1650\text{ cm}^{-1}$ . (B) XPS survey spectra of the ZnO powder, 40 wt% ZnO/BC foam and 70 wt% ZnO/BC foam. (C) Deconvoluted XPS peaks of O 1s of the 40 wt% ZnO/BC foam and 70 wt% ZnO/BC foam.
